# Supplementary material
Source: publisher site journal article supplement (https://www.e-cmh.org/upload/media/cmh-2022-0330-Supplementary-2.pdf)
Supplement: Supplementary file 1 [file cmh-2022-0330-Supplementary-2.pdf]

**Supplementary Material 2. Baseline characteristics of the included studies**

| Author (yr)                          | Age (range) | Age (mean) | Male (%) | Diabetic status                    | Liver disease status (NAFLD, NASH) | Experimental group                                                                        |    | Control group            |                                                         | Outcome* | Duration (wk) |                                                                                                                                                                                                                 |                          |
|--------------------------------------|-------------|------------|----------|------------------------------------|------------------------------------|-------------------------------------------------------------------------------------------|----|--------------------------|---------------------------------------------------------|----------|---------------|-----------------------------------------------------------------------------------------------------------------------------------------------------------------------------------------------------------------|--------------------------|
|                                      |             |            |          |                                    |                                    | Treatment                                                                                 | N1 | BMI (kg/m <sup>2</sup> ) | Treatment                                               |          |               | N2                                                                                                                                                                                                              | BMI (kg/m <sup>2</sup> ) |
| Idilman et al. (2008)                | >18         | 47.2       | 59.5     | T2DM                               | NASH                               | TZD vs. placebo<br>Rosiglitazone 8 mg/day +LSM <sup>†</sup>                               | 25 | 31.2±3.6                 | LSM <sup>†</sup>                                        | 25       | 32.2±5.1      | NAS, fibrosis stage, ALT (IU/mL), AST (IU/mL), BMI (kg/m <sup>2</sup> ), WC (cm), FPG (mg/dL), HOMA-IR, T-Chol (mg/dL), TG (mg/dL)                                                                              | 48                       |
| Kuchay et al. (2020)                 | >20         | 47.4       | 70.3     | T2DM                               | NAFLD                              | GLP-1RA vs. placebo<br>Dulaglutide 1.5 mg/week usual care <sup>‡</sup> +LSM <sup>†</sup>  | 27 | 29.6±3.6                 | Usual care <sup>‡</sup> +LSM <sup>†</sup>               | 25       | 29.9±3.9      | Liver fat contents (by CAP), ALT (U/L), AST (U/L), BMI (kg/m <sup>2</sup> ), HbA1c (mmol/mol, %), FPG (mmol/L), LDL-C (mmol/L), TG (mmol/L)                                                                     | 24                       |
| Zhang et al. (2020)                  | 18–70       | 50.9       | 46.7     | T2DM                               | NAFLD                              | GLP-1RA vs. TZD<br>Liraglutide 1.2 mg/day +LSM <sup>†</sup>                               | 30 | 27.6±5.2                 | Placebo<br>Pioglitazone 30 mg/day +LSM <sup>†</sup>     | 30       | 27.1±3.8      | Liver fat contents (by <sup>1</sup> H-MRS), ALT (natural logarithm), AST (natural logarithm), BMI (kg/m <sup>2</sup> ), WC (cm), HbA1c (%), FPG (mmol/L), HOMA-IR, T-Chol (mmol/L), LDL-C (mmol/L), TG (mmol/L) | 24                       |
| Omer et al. (2010)                   | NA          | 48.9       | 54.7     | T2DM or impaired glucose tolerance | NASH                               | TZD vs. placebo<br>Rosiglitazone 4 mg/day +LSM <sup>†</sup><br>+Metformin 1,700 mg/day    | 22 | 32.5±7.0                 | LSM <sup>†</sup><br>+Metformin 1,700 mg/day             | 22       | 30.8±6.6      | ALT (U/L), AST (U/L), BMI (kg/m <sup>2</sup> ), WC (cm), HbA1c (%), FPG (mg/dL), HOMA-IR                                                                                                                        | 48                       |
| Chehrehghoşa et al. (2021)           | 20–65       | 51.6       | 43.4     | T2DM                               | NAFLD                              | TZD vs. placebo<br>Pioglitazone 30 mg/day +LSM <sup>†</sup>                               | 34 | 29.4±3.7                 | Placebo<br>+LSM <sup>†</sup>                            | 37       | 30.2±4.4      | Liver fat contents (by CAP), BMI (kg/m <sup>2</sup> ), HbA1c (%), FPG (mg/dL), HOMA-IR, T-Chol (mmol/L), LDL-C (mg/dL), TG (mg/dL)                                                                              | 24                       |
| Kakazu et al. (2013)                 | ≥20         | 57.1       | 25.0     | T2DM or impaired glucose tolerance | NASH                               | TZD vs. placebo<br>Pioglitazone 15 mg/day +diet                                           | 12 | 28.2±4.4                 | Diet                                                    | 12       | 26.7±3.1      | ALT (IU/L), AST (IU/L), BMI (kg/m <sup>2</sup> ), HbA1c (%), FPG (mg/dL), HOMA-IR, LDL-C (mg/dL), TG (mg/dL)                                                                                                    | 96                       |
| Guo et al. (2020)                    | 30–60       | 52.6       | 59.3     | T2DM                               | NAFLD                              | GLP-1RA vs. placebo<br>Liraglutide 1.8 mg/day LSM <sup>†</sup><br>+Metformin 2,000 mg/day | 31 | 29.2±4.2                 | Placebo<br>+LSM <sup>†</sup><br>+Metformin 2,000 mg/day | 30       | 28.6±3.7      | Liver fat contents (by <sup>1</sup> H-MRS), ALT (U/L), AST (U/L), BMI (kg/m <sup>2</sup> ), WC (cm), HbA1c (%), FPG (mmol/L), HOMA-IR, T-Chol (mmol/L), LDL-C (mmol/L), TG (mmol/L)                             | 26                       |
| Armstrong et al. (2016) <sup>†</sup> | 18–70       | 51.0       | 59.6     | With or without T2DM               | NASH                               | GLP-1RA vs. placebo<br>Liraglutide 1.8 mg/day +LSM <sup>†</sup>                           | 23 | 34.2±4.7                 | Placebo<br>+LSM <sup>†</sup>                            | 22       | 37.7±6.2      | NAS, fibrosis stage, NASH resolution, ALT (U/L), AST (U/L), BMI (kg/m <sup>2</sup> ), WC (cm), HbA1c (mmol/mol, %), FPG (mg/dL), HOMA-IR, T-Chol (mmol/L), LDL-C (mmol/L)                                       | 48                       |

Supplementary Material 2. Continued

| Author (yr)                         | Age (range) | Age (mean) | Male (%) | Diabetic status                                              | Liver disease status (NAFLD, NASH) | Experimental group                                                                                                               |                | Control group                    |                           | Outcome* | Duration (wk)    |                                                                                                                                                                                                                          |                          |
|-------------------------------------|-------------|------------|----------|--------------------------------------------------------------|------------------------------------|----------------------------------------------------------------------------------------------------------------------------------|----------------|----------------------------------|---------------------------|----------|------------------|--------------------------------------------------------------------------------------------------------------------------------------------------------------------------------------------------------------------------|--------------------------|
|                                     |             |            |          |                                                              |                                    | Treatment                                                                                                                        | N1             | BMI (kg/m <sup>2</sup> )         | Treatment                 |          |                  | N2                                                                                                                                                                                                                       | BMI (kg/m <sup>2</sup> ) |
| Cusi et al. (2016)                  | 18–70       | 50.5       | 70.3     | T2DM or prediabetes                                          | NASH                               | TZD vs. placebo                                                                                                                  | 50             | 34.3±4.8                         | Placebo +diet             | 51       | 34.5±4.8         | Liver fat contents (by <sup>1</sup> H-MRS), NAS, fibrosis stage, NASH resolution, ALT (U/L), AST (U/L), BMI (kg/m <sup>2</sup> ), FPG (mg/dL, mmol/L), T-Chol (mg/dL, mmol/L), LDL-C (mg/dL, mmol/L), TG (mg/dL, mmol/L) | 72                       |
| Vedtofte et al. (2020) <sup>1</sup> | NA          | 36.9       | 0        | Non-diabetic with prior gestational diabetes mellitus (pGDM) | NAFLD                              | GLP-1RA vs. placebo                                                                                                              | 10             | 32.1 (27.4;36.3)                 | Placebo                   | 8        | 30.6 (28.4;33.0) | Liver fat contents (by CAP), ALT (U/L), AST (U/L), BMI (kg/m <sup>2</sup> ), WC (cm), HbA1c (mmol/mol, %), FPG (mmol/L), HOMA-IR, T-Chol (mmol/L), LDL-C (mmol/L), TG (mmol/L)                                           | 48                       |
| Sanyal et al. (2010)                | ≥18         | 46.3       | 40.0     | Non-diabetic                                                 | NASH                               | TZD vs. placebo                                                                                                                  | 70             | 34.0±6.0                         | Placebo +LSM <sup>1</sup> | 72       | 35.0±7.0         | NAS, fibrosis stage, resolution of NAS, ALT (U/L), AST (U/L), BMI (kg/m <sup>2</sup> ), WC (cm), FPG (mg/dL), HOMA-IR, TC (mg/dL)                                                                                        | 96                       |
| Belfort et al. (2006)               | 21–70       | 51.0       | 44.7     | T2DM or impaired glucose tolerance                           | NASH                               | TZD vs. placebo                                                                                                                  | 26             | 33.5±4.9                         | Placebo +diet             | 21       | 32.9±4.4         | Liver fat contents (by <sup>1</sup> H-MRS), fibrosis stage, ALT (U/L), AST (U/L), BMI (kg/m <sup>2</sup> ), HbA1c (%), FPG (mg/dL), TC (mg/dL), LDL-C (mg/dL), TG (mg/dL)                                                | 24                       |
| Newsome et al. (2021)               | 18–75       | 55.0       | 39.3     | With or without T2DM                                         | NASH                               | Semaoglutide 0.1 mg/day+LSM <sup>1</sup><br>Semaoglutide 0.2 mg/day+LSM <sup>1</sup><br>Semaoglutide 0.4 mg/day+LSM <sup>1</sup> | 80<br>78<br>82 | 36.1±6.4<br>35.6±6.1<br>35.2±6.6 | Placebo +LSM <sup>1</sup> | 80       | 36.1±6.6         | Fibrosis stage, resolution of NASH, ALT (U/L), AST (U/L), HbA1c (%), TC (mg/dL)                                                                                                                                          | 72                       |
| Aithal et al. (2008)                | 18–70       | 53.5       | 61.0     | Non-diabetic                                                 | NASH                               | TZD vs. placebo                                                                                                                  | 31             | 29.8±3.0                         | Placebo +LSM <sup>1</sup> | 30       | 30.8±4.1         | Fibrosis (stage), ALT (U/L), BMI (kg/m <sup>2</sup> ), HbA1c (%), FPG (mmol/L), HOMA-IR, T-Chol (mmol/L), LDL-C (mmol/L), TG (mmol/L)                                                                                    | 48                       |
| Bril et al. (2018) <sup>22</sup>    | 18–70       | 47.0       | 69.0     | Non-diabetic                                                 | NASH                               | TZD vs. placebo                                                                                                                  | 21             | 34.4±4.1                         | Placebo +LSM <sup>1</sup> | 17       | 34.4±4.1         | Fibrosis (stage), ALT (U/L), AST (U/L), BMI (kg/m <sup>2</sup> ), HbA1c (%), FPG (mg/mL)                                                                                                                                 | 72                       |
| Bril et al. (2018) <sup>22</sup>    | 18–70       | 54.0       | 71.0     | T2DM                                                         | NASH                               | TZD vs. placebo                                                                                                                  | 20             | 34.4±5.4                         | Placebo +LSM <sup>1</sup> | 25       | 34.4±5.4         | Fibrosis (stage), ALT (U/L), AST (U/L), BMI (kg/m <sup>2</sup> ), HbA1c (%), FPG (mg/mL)                                                                                                                                 | 72                       |

Supplementary Material 2. Continued

| Author (yr)                              | Age (range) | Age (mean) | Male (%) | Diabetic status                                                | Liver disease status (NAFLD, NASH) | Drug class          |                                                     | Experimental group |                   | Control group               |    | Outcome*          | Duration (wk)                                                                                                                                                                           |                          |
|------------------------------------------|-------------|------------|----------|----------------------------------------------------------------|------------------------------------|---------------------|-----------------------------------------------------|--------------------|-------------------|-----------------------------|----|-------------------|-----------------------------------------------------------------------------------------------------------------------------------------------------------------------------------------|--------------------------|
|                                          |             |            |          |                                                                |                                    | TZD vs. placebo     | GLP-1RA vs. placebo                                 | Treatment          | N1                | Treatment                   | N2 |                   |                                                                                                                                                                                         | BMI (kg/m <sup>2</sup> ) |
| Bril et al. (2019)                       | 18-70       | 59.0       | 88.0     | T2DM                                                           | NASH                               | TZD vs. placebo     | Pioglitazone 45 mg/day +LSM <sup>†</sup> +vitamin E | 29                 | 35.2±4.3          | LSM <sup>†</sup> +vitamin E | 33 | 33.6±4.0          | Liver fat contents (by <sup>1</sup> H-MRS), NAS, fibrosis (stage), NASH resolution, BMI (kg/m <sup>2</sup> ), HbA1c (%), FPG (mg/dL), T-Chol (mg/dL), LDL-C (mg/dL), TG (mg/dL)         | 72                       |
| Ratzl et al. (2008)                      | 18-75       | 53.6       | 59.0     | With or without T2DM                                           | NASH                               | TZD vs. placebo     | Rosiglitazone 4 mg/day +LSM <sup>†</sup>            | 32                 | 31.5±6.0          | Placebo +LSM <sup>†</sup>   | 31 | 30.5±4.4          | NAS, fibrosis (stage), HbA1c (%), FPG (mmol/L), HOMA-IR, TC (mmol/L), LDL-C (mmol/L), TG (mmol/L)                                                                                       | 48                       |
| Balas et al. (2007)                      | NA          | 49.7       | 46.0     | T2DM or impaired glucose tolerance                             | NASH                               | TZD vs. placebo     | Pioglitazone 30 mg/day +diet                        | 21                 | 33.6±1.2          | Placebo +diet               | 14 | 33.9±1.2          | BMI (kg/m <sup>2</sup> ), HbA1c (%), FPG (mg/dL)                                                                                                                                        | 24                       |
| Khoor et al. (2019)                      | 21-65       | 41.1       | 93.0     | Non-diabetic                                                   | NAFLD                              | GLP-1RA vs. placebo | Liraglutide 3 mg/day                                | 15                 | 34.3±3.9          | LSM <sup>†</sup>            | 15 | 32.2±3.2          | ALT (U/L), AST (U/L), BMI (kg/m <sup>2</sup> ), WC (cm), FPG (mmol/L), HOMA-IR                                                                                                          | 26                       |
| Khoor et al. (2017)                      | 21-65       | 41.4       | 91.7     | Non-diabetic                                                   | NAFLD                              | GLP-1RA vs. placebo | Liraglutide 3 mg/day                                | 12                 | 33.9±3.7          | LSM <sup>†</sup>            | 12 | 32.2±3.3          | ALT (U/L), AST (U/L), BMI (kg/m <sup>2</sup> ), WC (cm), FPG (mmol/L), HOMA-IR                                                                                                          | 26                       |
| Yaghoobi et al. (2017)                   | 30-55       | 37.0       | NA       | Non-diabetic                                                   | NAFLD                              | TZD vs. placebo     | Pioglitazone 30 mg/day +LSM <sup>†</sup>            | 30                 | 26.0±3.0          | LSM <sup>†</sup>            | 30 | 27.0±4.0          | ALT (mg/dL), AST (mg/dL), BMI (kg/m <sup>2</sup> ), FPG (mg/dL), T-Chol (mg/dL), TG (mg/dL)                                                                                             | 12                       |
| Anushiravani et al. (2019)               | 18-65       | 47.0       | 51.3     | Non-diabetic                                                   | NAFLD                              | TZD vs. placebo     | Pioglitazone 15 mg/day +LSM <sup>†</sup>            | 30                 | 25.1±3.7          | LSM <sup>†</sup>            | 30 | 26.1±3.1          | ALT (U/mL), AST (U/mL), BMI (kg/m <sup>2</sup> ), WC (cm), FPG (mg/dL), T-Chol (mg/dL), LDL-C (mg/dL), TG (mg/dL)                                                                       | 12                       |
| Armstrong et al. (2016) <sup>§,   </sup> | 18-70       | 57.5       | 64.0     | T2DM or impaired glucose tolerance or normal glucose tolerance | NASH                               | GLP-1RA vs. placebo | Liraglutide 1.8 mg/day                              | 7                  | 34.0 (30.7, 35.9) | Placebo                     | 7  | 36.5 (29.3, 40.0) | ALT (IU/L), AST (IU/L), BMI (kg/m <sup>2</sup> ), WC (cm), HbA1c (%), FPG (mmol/L), T-Chol (mmol/L), LDL-C (mmol/L), TG (mmol/L)                                                        | 12                       |
| Yan et al. (2015)                        | 18-65       | 51.6       | 53.0     | T2DM or impaired glucose tolerance                             | NAFLD                              | TZD vs. placebo     | Pioglitazone 15 mg/day +LSM <sup>†</sup>            | 47                 | 27.47±3.74        | LSM <sup>†</sup>            | 53 | 27.3±2.8          | Liver fat contents (by <sup>1</sup> H-MRS), ALT (IU/mL), AST (IU/mL), BMI (kg/m <sup>2</sup> ), WC (cm), HbA1c (%), FPG (mmol/L), HOMA-IR, T-Chol (mmol/L), LDL-C (mmol/L), TG (mmol/L) | 16                       |
| Corey et al. (2015) <sup>  </sup>        | ≥18         | 46.3       | 40.0     | Non-diabetic                                                   | NASH                               | TZD vs. placebo     | Pioglitazone 30 mg/day                              | 80                 | 34.0±6.0          | Placebo                     | 83 | 35.0±7.0          | T-Chol (mg/dL)                                                                                                                                                                          | 96                       |

BMI data were expressed as mean±standard deviation or median (interquartile range).

ALT, alanine aminotransferase; AST, aspartate aminotransferase; BMI, body mass index; CAP, controlled attenuation parameter; FPG, fasting plasma glucose; GLP-1RA, glucagon-like peptide-1 receptor agonist; <sup>1</sup>H-MRS, proton magnetic resonance spectroscopy; HOMA-IR, homeostasis model assessment of insulin resistance; LDL-C, low-density lipoprotein cholesterol; LSM, lifestyle modification; NA, Not addressed; NAFLD, nonalcoholic fatty liver disease; NAS, nonalcoholic fatty liver activity score; NASH, nonalcoholic steatohepatitis;

T2DM, Type 2 diabetes mellitus; T-Chol, total cholesterol; TG, triglyceride; TZD, thiazolidinedione; WC, waist circumference.

\*Not extractable data are represented in italics.

<sup>†</sup>Life style modification means the proper management of diet and guide to exercise.

<sup>‡</sup>Usual care indicates antidiabetic treatments used for T2DM like metformin, sulfonylurea, and insulin which is not the intervention drug. The same expression with the original article is documented in this table.

<sup>§</sup>These are different articles.

<sup>||</sup>There are no mentions with respect to any lifestyle modification.

<sup>\*\*</sup>These are subgroups from the same articles.
